# Supplementary material for: Analysis of Wheat Prolamins, the Causative Agents of Celiac Sprue, Using Reversed Phase High Performance Liquid Chromatography (RP-HPLC) and Matrix-Assisted Laser Desorption Ionization Time of Flight Mass Spectrometry (MALDI-TOF-MS)
Source: MDPI journal article supplement (doi:10.3390/nu6041578), 2014-04-15
Supplement: s1 [file s1]

## Supplementary Information

**Figure S1.** HPLC profiles of Brundage 96 and Bobwhite bulk gliadin and glutenin extracts each repeated three times to show no variation among runs. The HPLC fractions were collected from each run and combined to increase the amount of proteins in the final sample used for loading A-PAGE gels or analyzed using MALDI-TOF-MS. M = protein molecular weight marker (SM0441; Thermo Fisher Scientific Inc., Rockford, IL, USA).

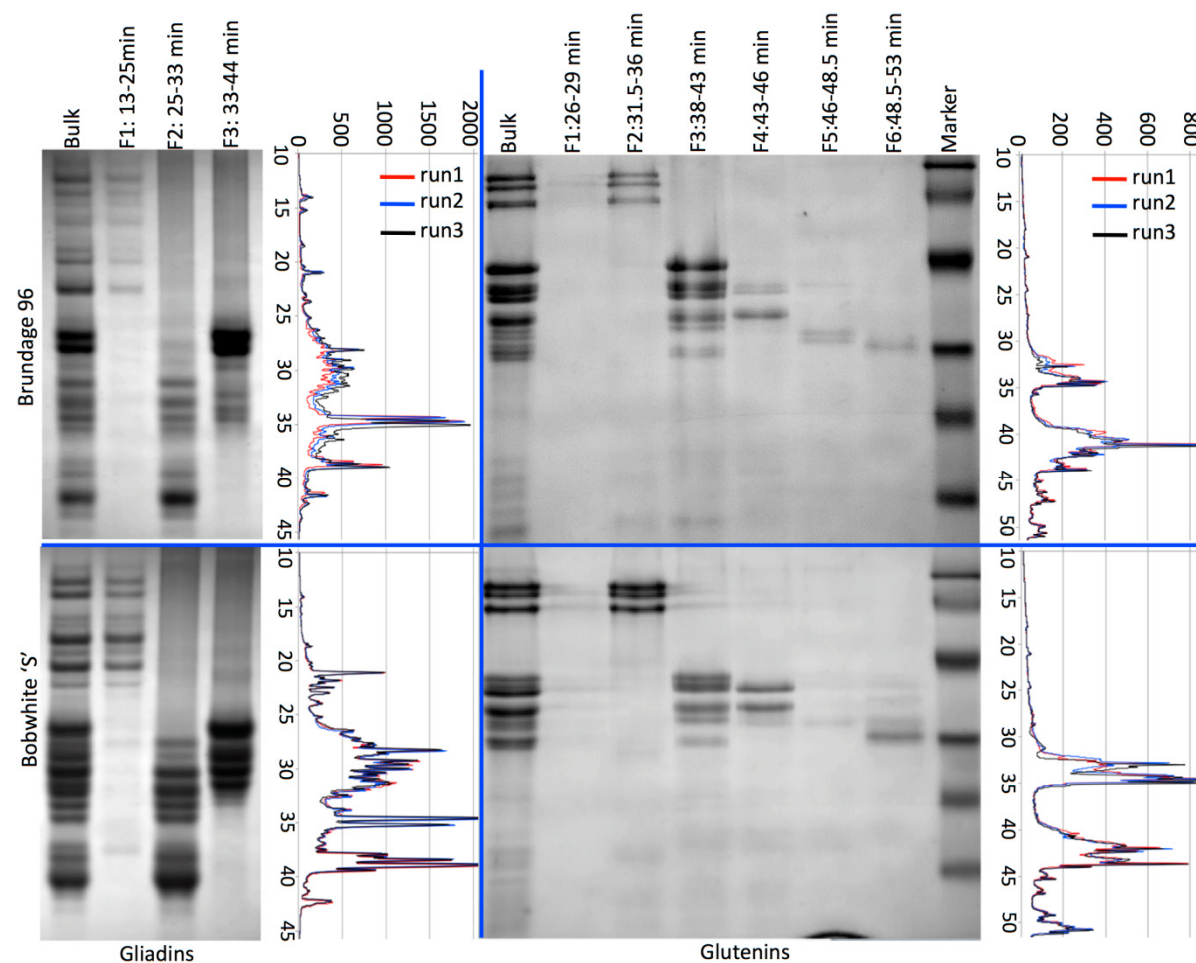

**Figure S2.** HPLC profiles of the bulk gliadin extract of Bobwhite obtained using Zorbax Eclipse Plus C18 and Zorbax 300SB-C8 columns. Two different flow rates were tested on the C18 column (a) and four different flow rates were tested on the C8 column (b) by injecting 30  $\mu$ L of gliadins. The columns were maintained at 60 °C and applied at a gradient of 20% to 60% non-polar solvent B containing 0.1% TFA and ACN for 60 min.

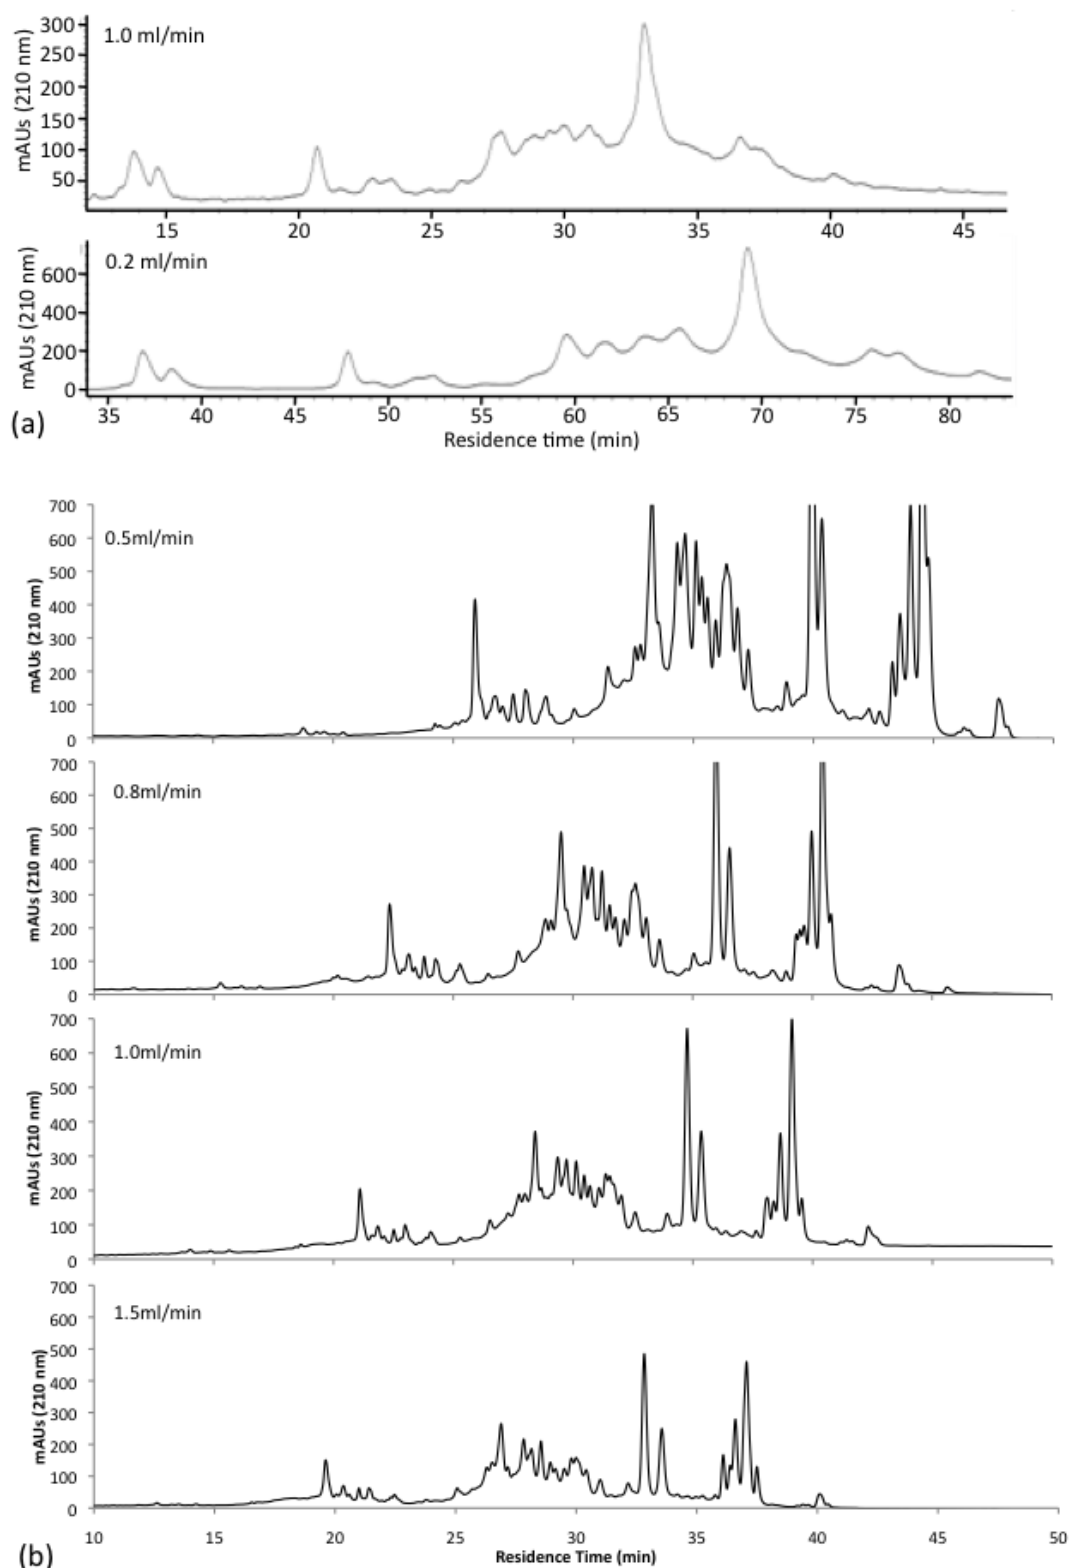

**Figure S3.** HPLC profiles of Bobwhite bulk gliadin extract obtained by injecting 30  $\mu$ L of sample on a Zorbax 300SB-C8 column maintained at three different temperatures: 40 °C, 50 °C and 60 °C. Each run applied a gradient of 20% to 60% non-polar solvent B containing 0.1% TFA and ACN for 60 min. The peaks showing variation are marked with an asterisk and/or arrow. The y-axis represents absorbance in mAU at 210 nm (not shown).

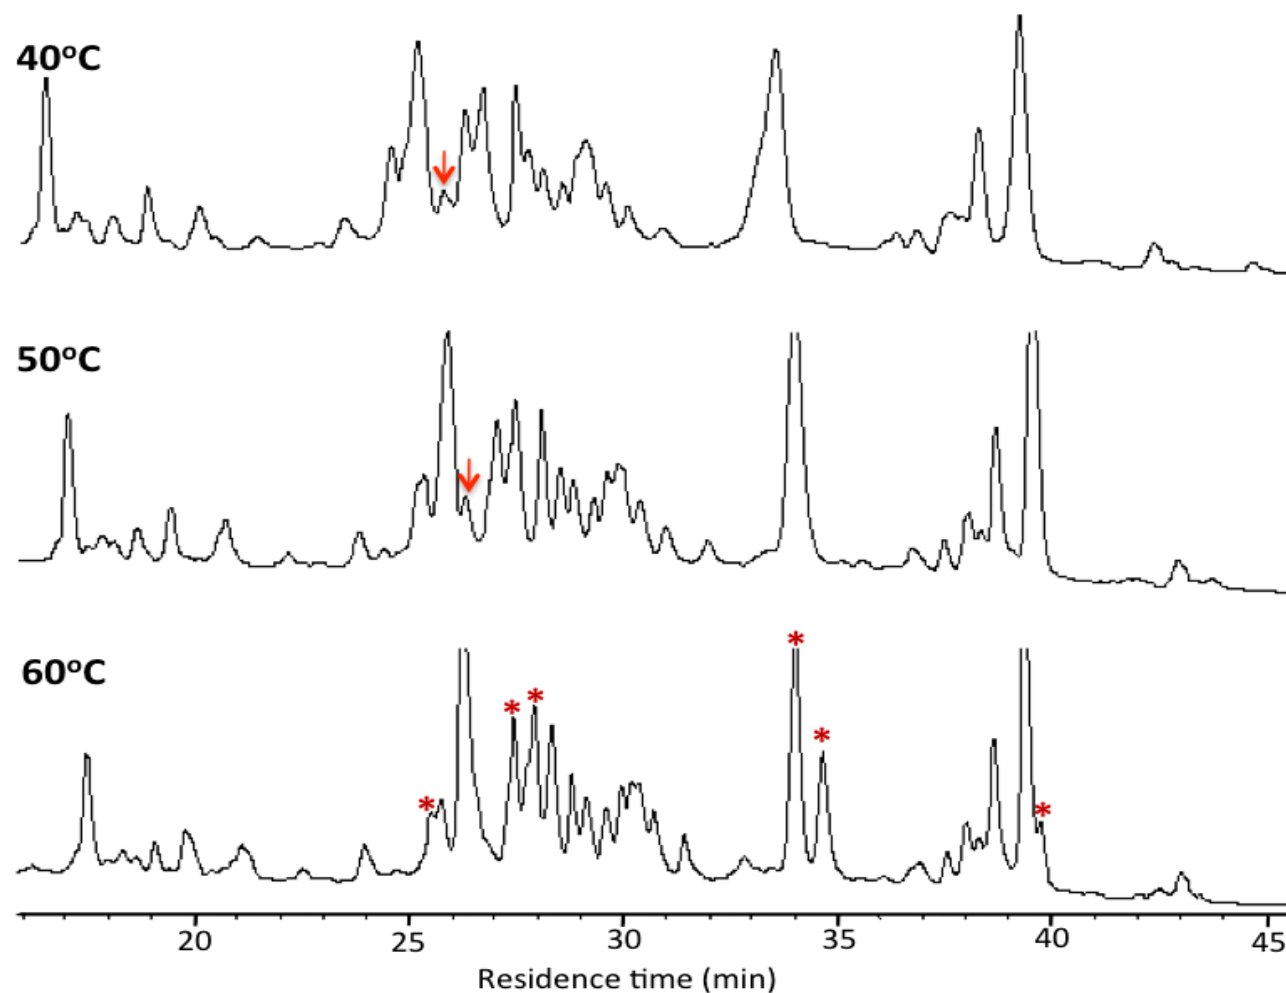

**Figure S4.** HPLC profiles of the Bobwhite bulk gliadin extract using two different gradients of the non-polar mobile phase solvent B containing 0.1% TFA and ACN: 10% to 80% (a) and 20% to 60% (b). In each run injected 30  $\mu$ L of the sample and the Zorbax 300SB-C8 column was maintained at 60 °C. The peaks showing variation are marked with an asterisk. The y-axis represents absorbance in mAU at 210 nm (units not indicated).

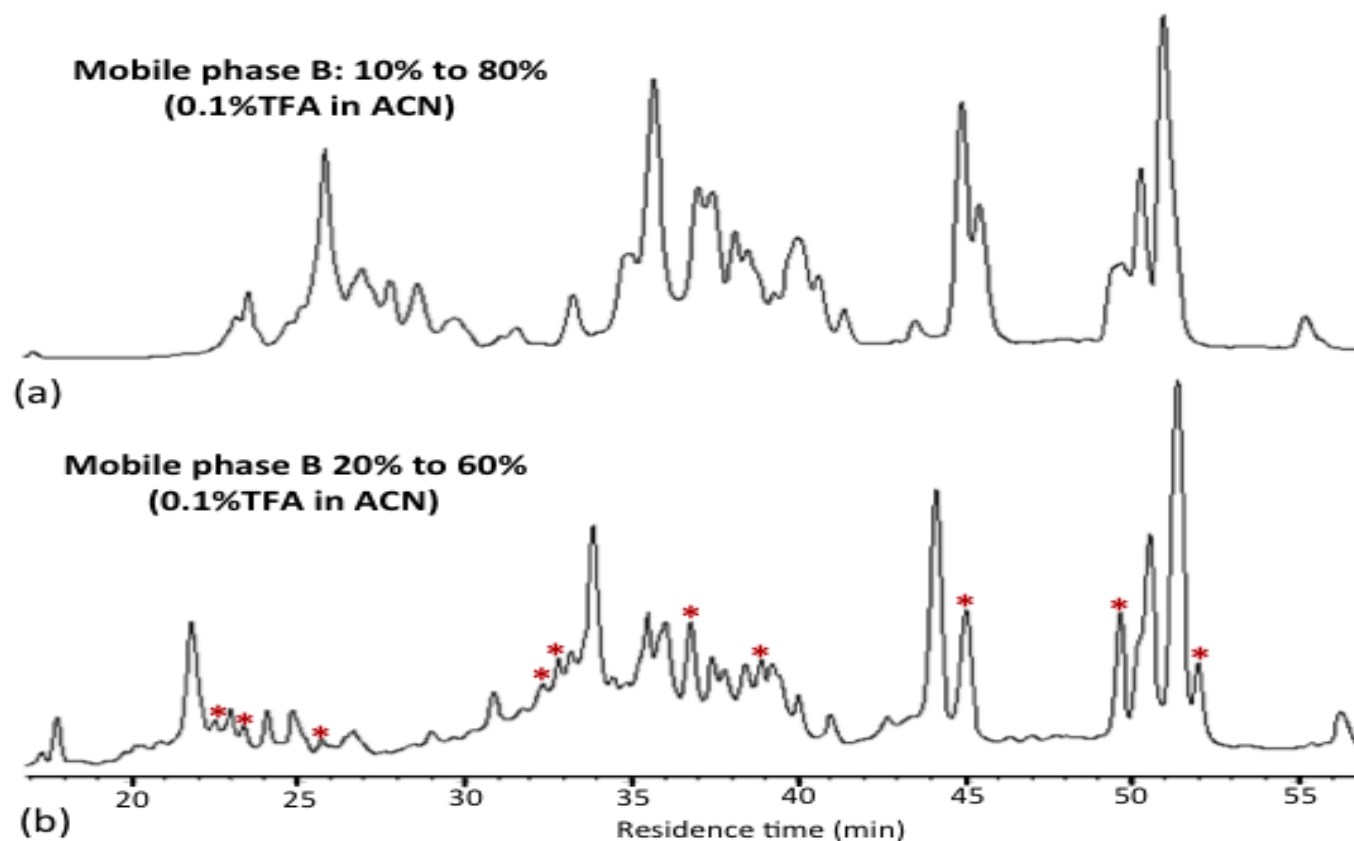

**Figure S5.** Mass spectrum of Brundage 96 bulk gliadin extract.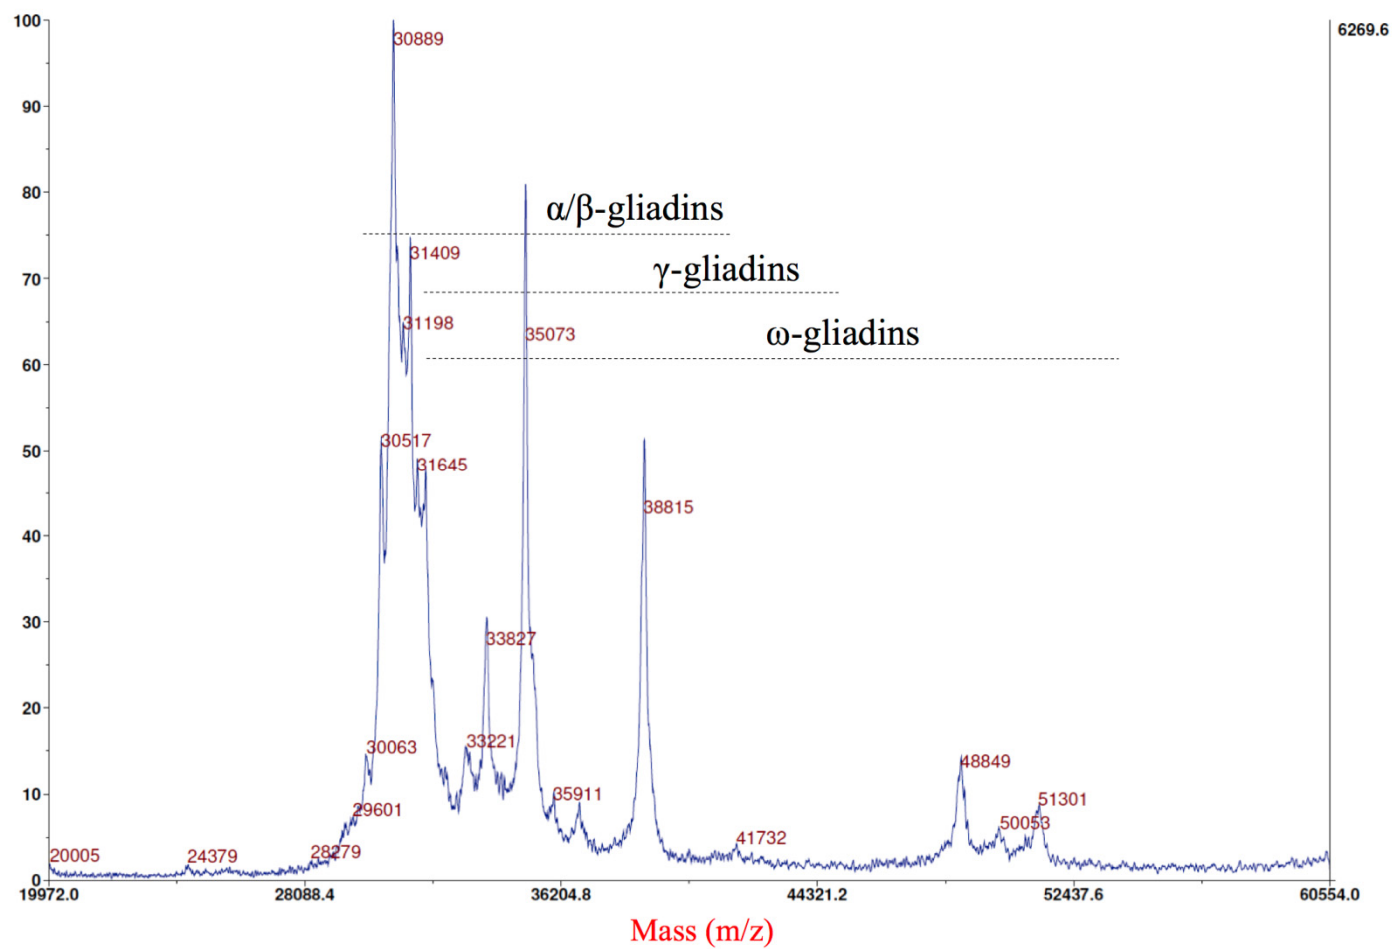

**Figure S6.** Mass spectrum of Brundage 96 bulk glutenin extract: in the presence of urea in the extraction buffer **(a)** and in the absence of urea in the extraction buffer **(b)**.

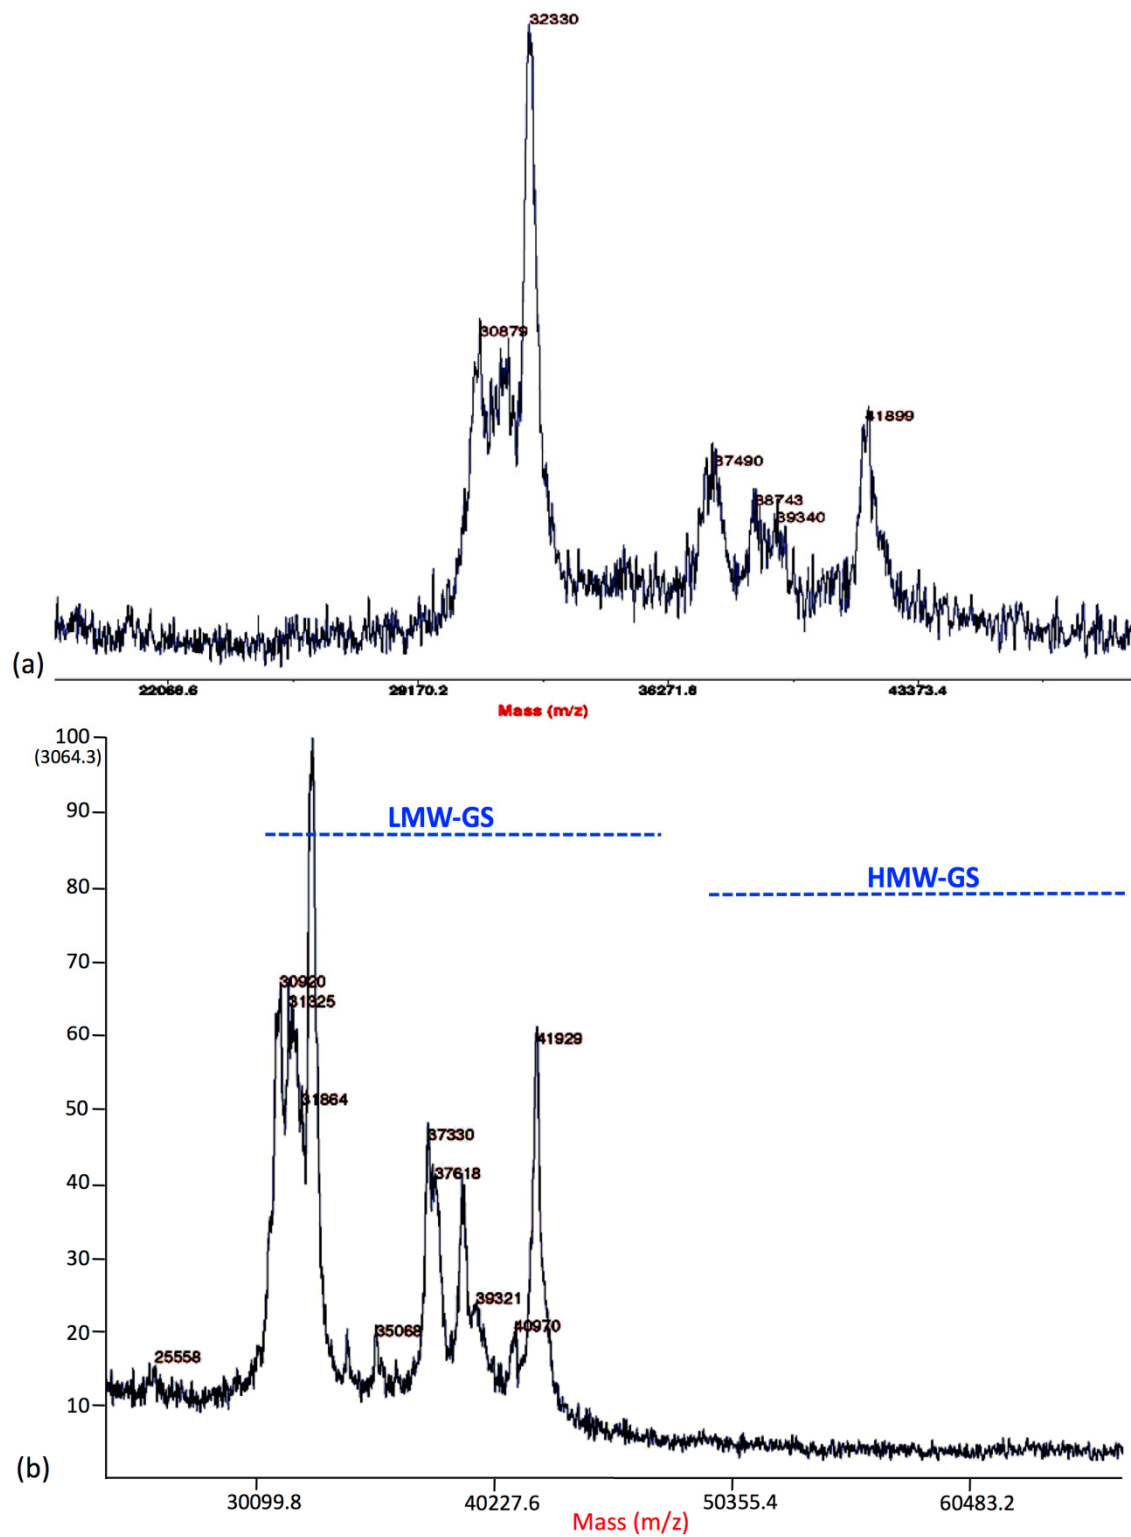

**Figure S7.** Glutenins extracted with buffers containing or omitting urea showed no variation in protein profiles using either SDS-PAGE or RP-HPLC. M = protein molecular weight marker (SM0441; Thermo Fisher Scientific Inc., Rockford, IL, USA).

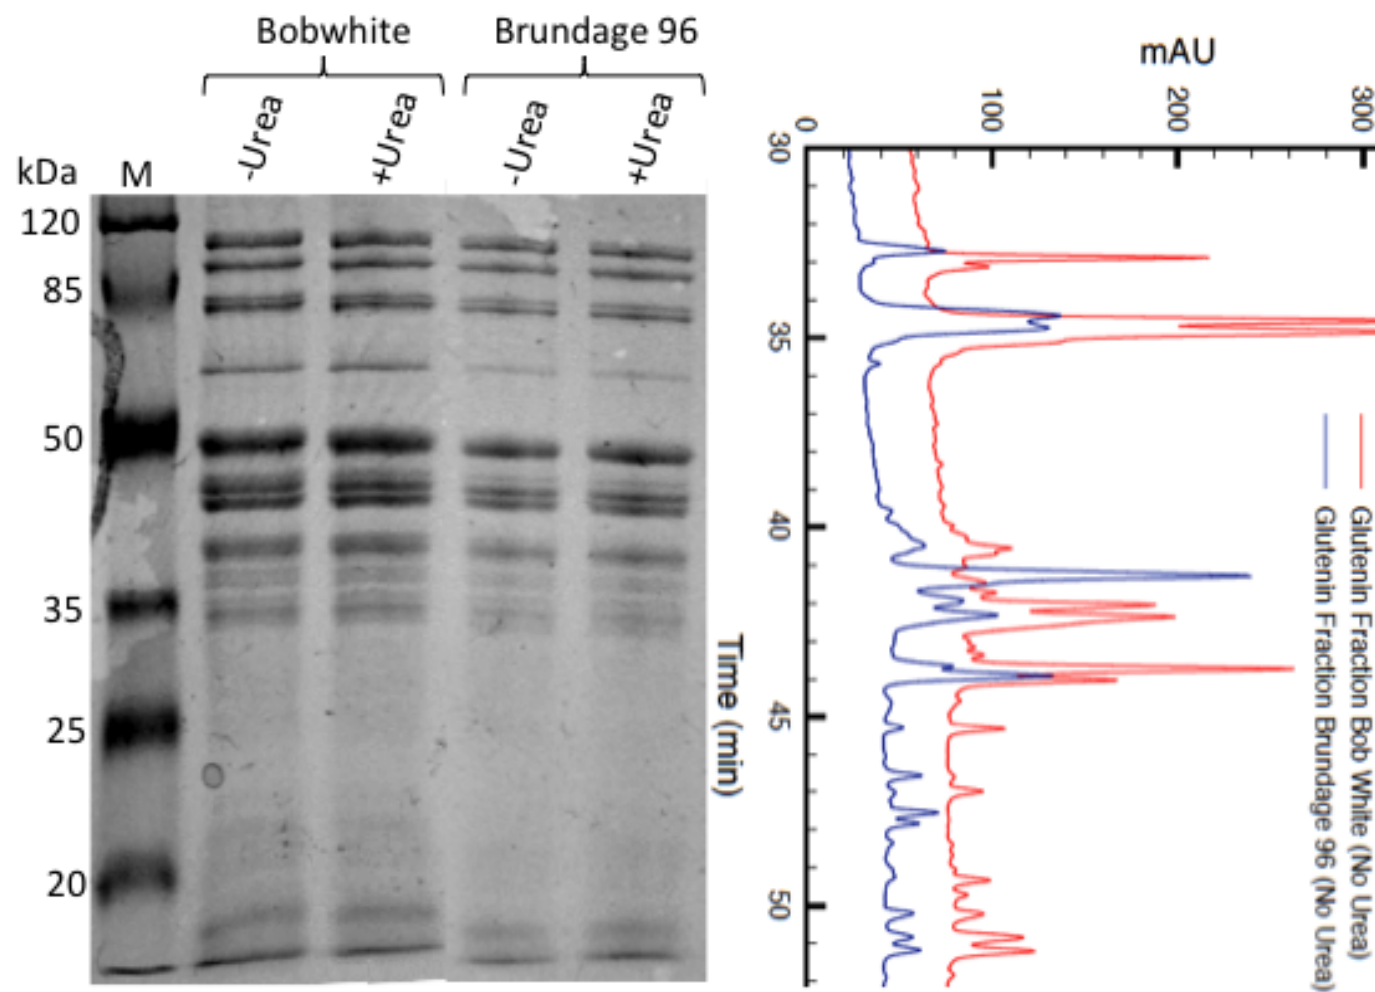

**Figure S8.** Standard curves prepared using known quantities (2.5 to 300 µg/mL) of bovine serum albumin using (a) densitometry, and (b) high performance liquid chromatography.

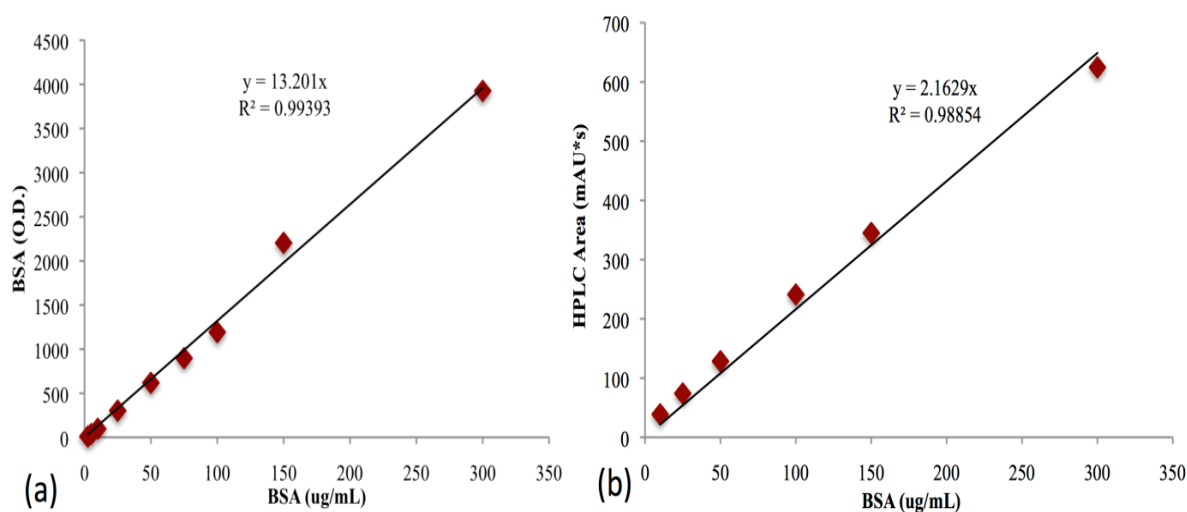

**Figure S9.** Regression plots showing correspondence in the relative protein quantifications made using densitometry [values recorded in optical density (O.D.)] and HPLC (values recorded in milli absorbance unit (mAU)). Glutenins and gliadins were derived from mature grains of two wheat cultivars, Bobwhite (a) and Brundage 96 (b). Each dot on the regression plot represents a prolamin fraction collected at a specific retention time from HPLC.

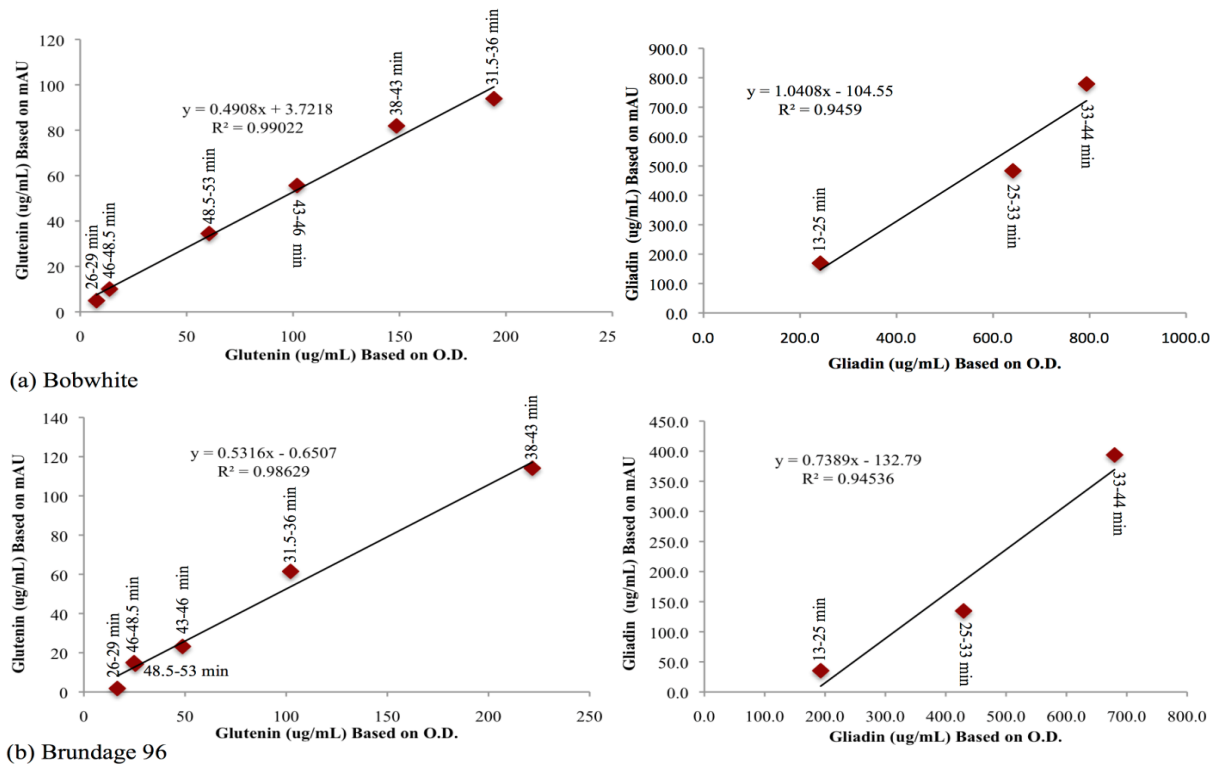



**Figure S10.** Comparison of relative protein quantities determined using densitometry (values recorded in optical density (O.D.)) and HPLC (values recorded in milli absorbance unit (mAU)) for each of the prolamin fraction obtained from Bobwhite (a) and Brundage 96 (b).

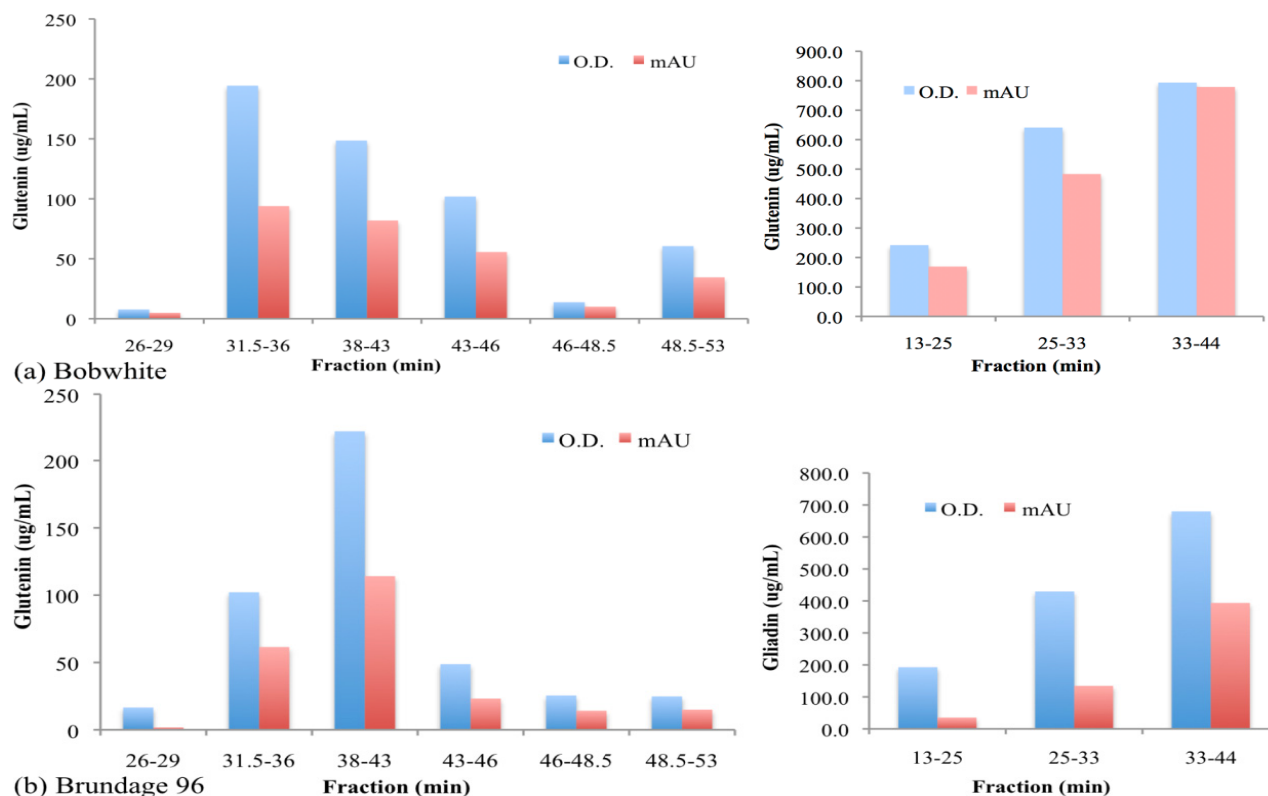

**Table S1.** Molecular masses of different prolamins and their proportions in the wheat endosperm.

| Class           | MW in kDa | Proportion (%) |
|-----------------|-----------|----------------|
| <i>Gliadin</i>  |           |                |
| $\alpha/\beta$  | 28–35     | 28–33          |
| $\gamma$        | 31–35     | 23–31          |
| $\omega 1,2$    | 39–44     | 4–7            |
| $\omega 5$      | 49–55     | 3–6            |
| <i>Glutenin</i> |           |                |
| LMW-GS          | 32–39     | 19–25          |
| $x$ -HMW-GS     | 83–88     | 4–9            |
| $y$ -HMW-GS     | 67–74     | 19–25          |

**Table S2.** Mass profile of the Brundage 96 bulk gliadin extract.

| Peak No. | Mass (Da) | Class                  |
|----------|-----------|------------------------|
| 1        | 29,637    | $\alpha/\beta$         |
| 2        | 30,044    | $\alpha/\beta$         |
| 3        | 30,509    | $\alpha/\beta$         |
| 4        | 30,872    | $\alpha/\beta$         |
| 5        | 31,374    | $\alpha/\beta, \gamma$ |
| 6        | 31,875    | $\alpha/\beta, \gamma$ |
| 7        | 32,526    | $\alpha/\beta, \gamma$ |
| 8        | 33,221    | $\alpha/\beta, \gamma$ |
| 9        | 33,823    | $\alpha/\beta, \gamma$ |
| 10       | 35,070    | $\alpha/\beta, \gamma$ |
| 11       | 35,903    | $\alpha/\beta, \gamma$ |
| 12       | 36,731    | $\omega 1,2$           |
| 13       | 38,811    | $\omega 1,2$           |
| 14       | 41,744    | $\omega 1,2$           |
| 15       | 48,837    | $\omega 5$             |
| 16       | 51,300    | $\omega 5$             |
| 17       | 62,752    | -                      |

**Table S3.** Mass profile of the Brundage 96 bulk gliadin extract.

| Peak No. | Mass (Da) | Class  |
|----------|-----------|--------|
| 1        | 20,039    | -      |
| 2        | 20,407    | -      |
| 3        | 20,936    | -      |
| 4        | 25,558    | -      |
| 5        | 30,920    | -      |
| 6        | 31,325    | -      |
| 7        | 31,864    | LMW-GS |
| 8        | 32,306    | LMW-GS |
| 9        | 35,068    | LMW-GS |
| 10       | 37,330    | LMW-GS |
| 11       | 37,618    | LMW-GS |
| 12       | 39,320    | LMW-GS |
| 13       | 40,970    | -      |
| 14       | 41,929    | -      |

**Table S4.** Mass profile of Brundage 96 gliadin HPLC fractions collected at the following retention times: 13–25, 25–33 and 33–44 min.

| Peak No.                      | Mass (Da) | Class                  | Peak No.                      | Mass (Da) | Class                  |
|-------------------------------|-----------|------------------------|-------------------------------|-----------|------------------------|
| <u>Fraction 1 (13–25 min)</u> |           |                        | <u>Fraction 2 (25–33 min)</u> |           |                        |
| 1                             | 20,070    | -                      | 1                             | 30,061    | $\alpha/\beta$         |
| 2                             | 20,452    | -                      | 2                             | 30,929    | $\alpha/\beta$         |
| 3                             | 20,592    | -                      | 3                             | 31,394    | $\alpha/\beta, \gamma$ |
| 4                             | 22,781    | -                      | 4                             | 31,640    | $\alpha/\beta, \gamma$ |
| 5                             | 25,609    | -                      | 5                             | 31,896    | $\alpha/\beta, \gamma$ |
| 6                             | 30,067    | $\alpha/\beta$         | 6                             | 32,515    | $\alpha/\beta, \gamma$ |
| 7                             | 30,876    | $\alpha/\beta$         | 7                             | 33,202    | $\alpha/\beta, \gamma$ |
| 8                             | 31,422    | $\alpha/\beta, \gamma$ | 9                             | 33,829    | $\alpha/\beta, \gamma$ |
| 9                             | 31,929    | $\alpha/\beta, \gamma$ | 10                            | 35,095    | $\alpha/\beta, \gamma$ |
| 10                            | 32,138    | $\alpha/\beta, \gamma$ | 11                            | 38,833    | $\omega 1,2$           |
| 11                            | 33,246    | $\alpha/\beta, \gamma$ | 12                            | 70,058    | -                      |
| 12                            | 33,844    | $\alpha/\beta, \gamma$ | 13                            | 73,748    | -                      |
| 13                            | 35,158    | $\alpha/\beta, \gamma$ | 14                            | 93,500    | -                      |
| 14                            | 35,967    | $\alpha/\beta, \gamma$ | <u>Fraction 3 (33–44 min)</u> |           |                        |
| 15                            | 40,288    | $\omega 1,2$           | 1                             | 29,334    | $\alpha/\beta$         |
| 16                            | 41,127    | $\omega 1,2$           | 2                             | 29,639    | $\alpha/\beta$         |
| 17                            | 41,738    | $\omega 1,2$           | 3                             | 29,992    | $\alpha/\beta$         |
| 18                            | 42,617    | $\omega 1,2$           | 4                             | 30,525    | $\alpha/\beta$         |
| 19                            | 48,877    | $\omega 5$             | 5                             | 31,838    | $\alpha/\beta, \gamma$ |
| 20                            | 50,066    | $\omega 5$             | 6                             | 35,112    | $\alpha/\beta, \gamma$ |
| 21                            | 51,337    | $\omega 5$             | 7                             | 35,380    | $\alpha/\beta, \gamma$ |
|                               |           |                        | 8                             | 36,781    | -                      |
|                               |           |                        | 9                             | 38,881    | $\omega 1,2$           |

**Table S5.** Mass profile of Brundage 96 glutenin HPLC fractions collected at the following retention times: 26–29, 31.5–36, 38–43, 43–46, 46.0–48.5 and 48.5–53.0 min.

| Peak No.                          | Mass (Da) | Class            | Peak No.                          | Mass (Da) | Class  |
|-----------------------------------|-----------|------------------|-----------------------------------|-----------|--------|
| <u>Fraction 1 (26–29 min)</u>     |           |                  | <u>Fraction 4 (43–46 min)</u>     |           |        |
| 1                                 | 20,033    | -                | 1                                 | 30,961    | -      |
| 2                                 | 20,345    | -                | 2                                 | 32,477    | LMW-GS |
| 3                                 | 20,963    | -                | 3                                 | 35,154    | LMW-GS |
| 4                                 | 22,582    | -                | 4                                 | 38,866    | LMW-GS |
| 5                                 | 23,446    | -                | <u>Fraction 5 (46.0–48.5 min)</u> |           |        |
| 6                                 | 34,305    | LMW-GS           | 1                                 | 30,505    | -      |
| 7                                 | 40,836    | -                | 2                                 | 30,979    | -      |
| 8                                 | 41,705    | -                | 3                                 | 31,443    | -      |
| 9                                 | 68,555    | $\gamma$ -HMW-GS | 4                                 | 31,981    | LMW-GS |
| 10                                | 87,017    | $x$ -HMW-GS      | 5                                 | 32,266    | LMW-GS |
| <u>Fraction 2 (31.5–36.0 min)</u> |           |                  | 6                                 | 35,156    | LMW-GS |
| 1                                 | 20,043    | -                | <u>Fraction 6 (48.5–53.0 min)</u> |           |        |
| 2                                 | 26,776    | -                | 1                                 | 27,403    | -      |
| 3                                 | 40,834    | -                | 2                                 | 29,426    | -      |
| 4                                 | 41,674    | -                | 3                                 | 29,951    | -      |
| 5                                 | 82,388    | $x$ -HMW-GS      | 4                                 | 30,939    | LMW-GS |
| 6                                 | 87,005    | $x$ -HMW-GS      | 5                                 | 31,443    | LMW-GS |
| <u>Fraction 3 (38–43 min)</u>     |           |                  | 6                                 | 31,802    | LMW-GS |
| 1                                 | 30,881    | -                | 7                                 | 34,123    | LMW-GS |
| 2                                 | 31,865    | LMW-GS           | 8                                 | 36,850    | LMW-GS |
| 3                                 | 32,293    | LMW-GS           |                                   |           |        |
| 4                                 | 37,660    | LMW-GS           |                                   |           |        |
| 5                                 | 41,132    | -                |                                   |           |        |
| 6                                 | 42,053    | -                |                                   |           |        |
